# Supplementary material
Source: PubMed Central journal article supplement (PMC3141996)
Supplement: 1018098108_pnas.201018098SI.pdf [file 1018098108_pnas.201018098SI.pdf]

# Supporting Information

Reiling et al. 10.1073/pnas.1018098108

## SI Materials and Methods

**Molecular Biology and Plasmids.** The construction of gene trap (GT) vectors, mapping of GT integration sites, RT-PCR protocol to determine major facilitator domain containing 2A (MFSD2A) expression in the GT lines, and general screening approach are described in detail by Carette et al. (1).

MFSD2A cDNA was obtained by PCR amplification using primers with overhanging restriction sites (oJR261/SalI and oJR262/NotI) and a HEK293T cDNA pool as a DNA source. A PCR band of the correct length was TOPO TA (Invitrogen) subcloned, sequence-verified, and inserted as SalI/NotI fragment into SalI/NotI-digested lentiviral plasmids pLJM60 (puromycin resistant) or pLJM61 (neomycin resistant). This led to the generation of an N-terminally Flag-tagged MFSD2A cDNA construct used for lentivirus production. Flag-MFSD2A $\Delta$ C and Flag-MFSD2AKKRO [endoplasmic reticulum (ER) retention signal] mutant constructs were obtained with Flag-MFSD2A in pLJM61 as the DNA template and the following primers: Flag-MFSD2A $\Delta$ C3: oJR261/SalI and oJR278/NotI; Flag-MFSD2A $\Delta$ C10: oJR261/SalI and oJR323/NotI; Flag-MFSD2A $\Delta$ C23: oJR261/SalI and oJR322/NotI; Flag-MFSD2A $\Delta$ C40: oJR261/SalI and oJR321/NotI; Flag-MFSD2AKKRO: oJR261/SalI and oJR314/NotI. For generation of the N-glycosylation site-deficient MFSD2A form (Flag-MFSD2A $\Delta$ N-glyco), the QuikChange site-directed mutagenesis kit (Agilent) was used according to the supplier's instructions using primers oJR352 and oJR353 and Flag-MFSD2A as the template. The R90A, D93A, D97A, and K436A MFSD2A mutant constructs were generated through site-directed mutagenesis using Flag-MFSD2A (WT) as the DNA template for the PCR reaction and the following primers: oJR374 and oJR375 (R90A), oJR368 and oJR369 (D93A), oJR370 and oJR371 (D97A), and oJR376 and oJR377 (K436A). An EGFP-MFSD2A plasmid was made by (i) PCR-amplifying MFSD2A using Flag-MFSD2A in pLJM61 as the DNA template with primers oJR279/SalI and oJR280/BamHI, TOPO TA subcloning, digestion with SalI/BamHI, and insertion into pEGFP-C1 (Clontech); (ii) another PCR with oJR300/AgeI and oJR301/XbaI primers using EGFP-MFSD2A in pEGFP-C1 as the DNA template yielded the EGFP-MFSD2A cDNA that was cloned as an AgeI/XbaI fragment into digested lentiviral plasmid pLJM13. The entire EGFP-MFSD2A coding region was sequence-verified.  $\gamma$ -Tubulin and Rap2a in prk5 have been previously described (2). The cDNAs were excised as SalI/NotI fragments and cloned into pLJM60 or pLJM61. All constructs were checked for mutations by sequencing. An MFSD1 cDNA clone was ordered from Open Biosystems and PCR-amplified with primers oJR350/SalI and oJR351/NotI before integration into pLJM60 and pLJM61 plasmids. UDP-GlcNAc:dolichol phosphate GlcNAc-1-phosphate transferase (DPAGT1) was cloned out of a HEK293T cDNA pool using oJR276/SalI and oJR277/NotI primers. After TOPO subcloning and sequence verification, a SalI/NotI-DPAGT1 fragment was ligated into pLJM60/61.

**Cell Lines and Tissue Culture.** KBM7 were grown in Iscove's modified Dulbecco's medium (IMDM) with 10% heat-inactivated fetal serum (IFS) and antibiotics. All other cell lines with the exception of Jurkat T cells, which were grown in RPMI with 10% FBS, were cultured in DMEM supplemented with 10% IFS, 250 units/mL penicillin, and 250  $\mu$ g/mL streptomycin.

**Antibodies and Reagents.** The following antibodies were used in this study: rabbit anti-GRP78 and goat anti-GRP94 (Santa Cruz);

mouse anti- $\alpha$  tubulin (Sigma); rabbit anti-Flag, rabbit anti-inositol-requiring enzyme-1 $\alpha$  (IRE1 $\alpha$ ), mouse anti-CHOP, rabbit anti-Raptor, rabbit anti-phospho eIF2 $\alpha$ , rabbit anti-PDI, and rabbit anti-Ero1-L $\alpha$  (Cell Signal Technologies). Rabbit anti-class I MHC serum (HC70) and mouse anti-W6/32 were described previously (3). Tunicamycin, thapsigargin, brefeldin A, etoposide, DTT, 2-deoxyglucose, Phloretin, and Chlorpromazine hydrochloride were purchased from Sigma-Aldrich; 16% paraformaldehyde solution (PFA) was obtained from Electron Microscopy.

**Virus Production.** HEK293T cells (800,000) were seeded into 6-cm culture dishes the day before transfection; 0.1  $\mu$ g VSV-G (envelope plasmid), 0.9  $\mu$ g  $\Delta$ vpr (packaging plasmid), and 1  $\mu$ g lentiviral plasmid were transfected into cells using TransIT-LT1 reagent (Mirus). The transfection mix was removed ~12 h later and replaced with 6 mL harvesting media (DMEM plus 30% IFS, 250 units/mL penicillin, 250  $\mu$ g/mL streptomycin). Culture supernatants containing lentiviral particles were harvested 48 h after transfection. Lentiviral infections of target cells were done in the presence of 8  $\mu$ g/mL polybrene, and cells were selected with the appropriate antibiotic 24 h after infection.

**PNGase F Treatment.** A 40- $\mu$ L slurry of Flag/Agarose beads was washed three times in lysis buffer. For immunoprecipitation (IP), 500  $\mu$ g protein lysate were combined with Flag beads and immunoprecipitated for 2.5 h at 4  $^{\circ}$ C. After three washing steps in lysis buffer, liquid was completely aspirated, and 35  $\mu$ L denaturing buffer (New England Biolabs) were added to the bead pellet. The samples were scratched on a tube rack several times and boiled for 5 min before the eluate was loaded onto a microspin chromatogram column and briefly centrifuged to remove the beads; 5  $\mu$ L PNGase F (New England Biolabs) were added to a 15- $\mu$ L sample and incubated for 1 h at 37  $^{\circ}$ C. The reaction was stopped by adding 5  $\mu$ L 5 $\times$  sample buffer to the sample mix before subjecting it to SDS/PAGE.

**Quantitative Real-Time PCR.** RNA was extracted using TRIzol (Invitrogen) or RNeasy kit (Qiagen) followed by on-column DNase I (Qiagen) digest; 1  $\mu$ g total RNA and SuperScript first-strand synthesis system (Invitrogen) were used for the reverse-transcription reaction using Oligo dT primers. SYBR Green PCR Master Mix (Applied Biosystems) was used according to manufacturer's instructions. Real-time PCR reactions were run on an ABI 7900HT machine. PCR volume was 10  $\mu$ L (384-well plate), and data values were derived from three biological replicates using the comparative Ct method.

**shRNA/cDNA Cotransfection.** Two million HEK293T cells were seeded into 10-cm tissue culture dishes 24 h before transfection of 400 ng shRNA plasmids and 250 ng tagged cDNA construct. The total amount of plasmid DNA in each transfection was brought to 2  $\mu$ g with empty vector. Cells were lysed 48 h after transfection, and Flag immunoprecipitation was performed as described.

**Bright-Field Images.** Pictures of live cells were taken with a Canon Power Shot 5 digital camera mounted on a Zeiss Axiovert 40 CFL microscope.

**Liquid Chromatography Tandem MS.** This liquid chromatography tandem MS (LC-MS) procedure was used for tunicamycin (TM) detection as described in Fig. S8. KBM7 (Fig. S8A), stable PANC1 (Fig. S8B), or A549 (Fig. S8C) cells expressing the

protein of interest were washed three times with ice-cold PBS before lysis in 200–300  $\mu$ L 80% or 100% methanol. Samples were pipetted up and down several times, briefly vortexed, and left standing at  $-20^{\circ}$  for 1 h before further storage at  $-80^{\circ}$  C. Measurement of TM for Fig. S8 was carried out using a QSTAR XL hybrid quadrupole/time of flight mass spectrometer equipped with a TurboSpray source (AB SCIEX) that was coupled to an Agilent 1100 HPLC system (Agilent Technologies). Chromatographic separations were achieved using a  $150 \times 2.1$  mm Atlantis T3 column (Waters) that was initially eluted isocratically at 200  $\mu$ L/min with 70% mobile phase A (0.1% formic acid in aqueous 10 mM ammonium formate) and 30% mobile phase B (0.1% formic acid in acetonitrile) for 3 min followed by a 17-min linear gradient to 90% mobile phase B. MS data were acquired in the positive ion mode using time of flight scanning over  $m/z$  800–900 with an accumulation time of 0.5 s. MS electrospray ionization source settings were as follows: gas1 was 70, gas2 was 60, curtain gas was 30, spray voltage was 5.0 kV, and source temperature was 450  $^{\circ}$ C. Before LC-MS analyses, cell extracts were concentrated 10-fold by drying 300  $\mu$ L extract using a Turbopap LV nitrogen evaporation system (Caliper) and then resuspending the sample in 30  $\mu$ L methanol; 4  $\mu$ L sample were injected for each LC-MS analysis. MultiQuant software (version 1.1; AB SCIEX) was used for peak integration, and data were manually reviewed for quality of integration. TM signal intensities were normalized to cell number and averaged from three biological replicates.

#### Primer Sequences.

RTMFSD2A-1\_F Ctggtgtcatcctgatcc  
 RTMFSD2A-1\_R Caagacaagttcccctcca  
 RTMFSD2A-2\_F Gcctccatcctctgttgt  
 RTMFSD2A-2\_R Atggaaacactgaccattg  
 RACTB-1\_F gctcgtcgtcacaacggctc  
 RACTB-1\_R Caaacatgatctgggtcatcttctc  
 h36B4\_forward: CAGCAAGTGGGAAGGTGTAATCC  
 h36B4\_reverse CCCATTCTATCATCAACGGGTACAA  
 oMFSD2A\_Esnault1\_forward: CTCCTGGCCATCATGCTCTC  
 oMFSD2A\_Esnault1\_reverse: GGCCACCAAGATGAGAAA  
 DPAGT1\_forward1: CTCTGTGGTCAGGACCTCAAC  
 DPAGT1\_reverse1GGGGAATGCCTTACTACTGCT

oJR261/SalI: gtcgaccATGGCCAAAGGAGAAGGCGCCGA-GAGC  
 oJR262/NotI: gcggccgcCTAGAGGATGCTAGCCAGCTCTGTGG  
 oJR276/SalI: gtcgaccATGTGGGCCTTCTCGGAATTGC  
 oJR277/NotI: gcggccgcGACTCAGACATCATAGAAGAGTCCG  
 oJR278/NotI: gcggccgcctaAGCCAGCTCTGTGGAGTCTG  
 oJR279/SalI: GTCGACATGGCCAAAGGAGAAGGCGCC-GAGAGC  
 oJR281/BamHI: ggatccCTAGAGGATGCTAGCCAGCTCTGTGG  
 oJR300/AgeI: accggtATGGTGAGCAAGGGCGAGGAGC  
 oJR301/XbaI: tctagaCTAGAGGATGCTAGCCAGCTCTGTGG  
 oJR314/NotI: gcggccgcTCAttgaccttcttGAGGATGCTAGCCAGCTCTGTGG  
 oJR321/NotI: gcggccgcctaTTTGAAGAGCAGCAGGCCCCAGC  
 oJR322/NotI: gcggccgcctaCTGCAGGGCCTTCTTATTCTGC  
 oJR323/NotI: gcggccgcctaTTCTGAGCAGCCAGAGCTGC  
 oJR350/SalI: gtcgacaATGGAGGAGGAGGATGAGG  
 oJR351/NotI: gcggccgcTCATTcAGTATGGGAAAATTTTATTCTTCC  
 oJR352: CCTGTTTTCCAGGACCTCcAgAGCTCTACAGTAGCTTCACAAAGTGCCcAaCATACACATGGCACCA-CC  
 oJR353: GGTGGTGCCATGTGTATGtTgGGCACTTTGTGAAGCTACTGTAGAGCTcTgGAGGTCCTGGAAAC-AAGG  
 oJR368: CCTGTTTTGTGGGCCGAGCCTGGGcTGCCATCACAGAC  
 oJR369: GGTCTGTGATGGCAgCCCAGGCTCGGCCACAAACAGG  
 oJR370: CCTGGGATGCCATCACAGcCCCCCTGGTGGCCTCTGC  
 oJR371: GCAGAGGCCACCAGGGGgCTGTGATGGCATCCCCAGG  
 oJR374: CCTGTTTTGTGGGCGCAGCCTGGGATGCC  
 oJR375: GGCATCCCAGGCTGCGCCACAAACAGG  
 oJR376: CCTTCTATGTCTTCTTACCgCGTTTTGCCTCTGGAGTGTCACTGG  
 oJR377: CCAGTGACACTCCAGAGGCAAACCGCGGTGAAGAAGACATAGAAGG

1. Carette JE, et al. (2009) Haploid genetic screens in human cells identify host factors used by pathogens. *Science* 326:1231–1235.  
 2. Sancak Y, et al. (2008) The Rag GTPases bind raptor and mediate amino acid signaling to mTORC1. *Science* 320:1496–1501.

3. Lorenzo ME, Jung JU, Ploegh HL (2002) Kaposi's sarcoma-associated herpesvirus K3 utilizes the ubiquitin-proteasome system in routing class major histocompatibility complexes to late endocytic compartments. *J Virol* 76:5522–5531.

```

hmfsd2a      1  MAKGEAEGSAGLLPSTILQSTER-PAQVKKEPKKKKQ-QLSVCNKIKVALGGAPYQVTCALGFFLQIYLLDVAQVGFPSISILFVGRAWDAITDPLVGLC
hmfsd2b     1  ----MAAPPAPAAKGSQPEPHAPEPGPGSAKRGRSDRAGRLSFCCKKVCYGIQGVVNOHASSATAVYQLQLLLDIAQIPAAQVSLVLFGRKVSQAADPVAQGF
MelB        1  -----MSISMTKLSYGFAGFKDFAIQVYMYIMYYITDQVGLSVDVGLTFLVVARWDAINDPIMGWI
NP_414804   1  -----MTQITMKDKLIGYGLGDTACGFVWQATMLLALYFYTDVFGHSAGIIMGTLFLVSRVLDADVDPLMGLI
YP_324084   1  -----SQKDLRKTLLAYGAGDLPATANISIFLLIIFPNNVAGHPAGLAGSVMIGRWDADVNDPFGVGL
YP_001865367 1  -----MKDSAADGDAQDRILSEKLDLRTKLLAYGAGDLPATANISIVYLLIIFPNSVAGHPAGLAGTLMIGRWDGVNDPFLVGF
YP_002462749 1  -----MAATTSAS-----SERSLARLLAYGAGDLPATIVASPOLYSLTIAQHPAGLAGTLLIVKWDVNDPFIQNL
YP_002483054 1  -----MSTTTPF-----SEKMLNSKLLAYGAGDLPATITVYFQILFLNNAVAGHPAGLAGSVMIGRWDADINDPFGVGL

hmfsd2a     104 ISKSPWTCGLRMLPNIIFSTPLAVIAYFLNFPVDFP-----HGQTYVYLLFYCLFETMVCYFHVYPSALTMPFISTEQTERDSATAYRMTVEVLGTVLGTAIQ
hmfsd2b     102 INRSQRTGSRMLPNIIFSTPLAVIAYFLNFPVDFP-----SLRGLWYITFYCLFQALAFVFOVPTALTMLTTPCPRERDSATAYRMTVEMACTLMTGATVH
MelB        66 VNAATRSR--WGKFKPMLLIGTFLANSVILFLLSAHLFEG-----TQIVFVCTYILWGMTYTFMDIPFWSLVEITLTDKREHQLVPPVPRFASLAGFVTVAGVT
NP_414804   67 VDRTRSR--HQQFRPFLWGAHPFGIVCVLTFYTPDFS-----AQQKIYACVYIILLTLVYTFVNVVPCAMPGVITADPKRHALQSWRFFLAACCSLAISGIA
YP_324084   70 TDKTKSRRWGRRLPMLWGAHPFGIFFLQWIVPFRSSDQGSNVWALFWYVYVIGLISQVRYTVVNPYATLTPPELTDYDERLNSYRFAFASIGGSLSLILS
YP_001865367 82 TDKTKSRRWGRRLPMLWGAHPFGIFFLQWIVPFRSSANKSNINWPLFWYVAIGVISQAFYTVVNPYATLTPPELTDYDERLNSYRFAFASIGGSLSLILS
YP_002462749 85 TDKTKSRRWGRRLPMLWGAHPFGIFFLQWIVPFRS-----VTGKFYVYLIALLPDTAFTVNVNPYATLTPPELTDYDERLNSYRFAFASIGGSLSLILS
YP_002483054 74 TDKTKSRRWGRRLPMLWGAHPFGISYFLLMVYVPSLGGDRQQIWLFWYVAIVGIIQVYFVTVVNPYATLTPPELTDYDERLNSYRFAFASIGGSLSLILS

hmfsd2a     202 GQIVGQADTPCFQDLNSST-VASQSANHTGTTSHRETQKAVLLAAGVIVCIYIICAVILLGVREQREPYSAQ-----QSEPIAYFRGRLVMSHGPFYIKLITG
hmfsd2b     200 GLIVSGAHRPHRCEATAIPGGVTVSPNAH-----LVCIAAAVVVYPPYCISLLCLGVREPPDPSAFA-----SGPGLSFLAGHSLTTRHPYKLVLS
MelB        164 LPFWNVGGDGR-----FGQMFLLIATFFVSTLITERNVHEVSSDQPSAEGSHLTKAIYALYKRDQLSCLLQW
NP_414804   165 LPVLSIIGKDEQVG-----VFGAMCVGLSGVLLVYCFITKREI-VYDFVQ-----PGSSAKDKLLLOKSNWRINCF
YP_324084   175 KVVLSSLSDRQQ-----YVLAIAICTVSSVSLYCVFQVGRDVLAFSAKRQIEBDSISPPEEQKIYFSNRPLFVIGI
YP_001865367 187 GIVFSQIADRQR-----YVLAGICTVSSVSLYCVFQVGRDVLAFSAKRQIEEPEESPFPEEQKIYFSNRPLFVIGI
YP_002462749 173 QIIVGQFADQRYG-----YLVSGAVVGVLIATPFLWCFQGRER--YBPE-----PGAELSLLDQRYVYKMRPLFVIGI
YP_002483054 179 QIIFSQISDRQQ-----YLLNALCAVIAIALYWCYVGRQVLKESASRTHTEESQAIGLQOKIYFSNRPLFVIGI

hmfsd2a     301 FLFTSLAFMLVEGNFVLCYTYLQFRN-----EFQNLMLAIMLSLFTIPIWQWFLTRPKKRTAVYVGISSAVP---FLILVALMESN-LIITY
hmfsd2b     290 FLFISAVVVEQSYLVLCYTHASQLHD-----HVQGLVLTLLVSAVSTPLWVWVLRPKKRTSAFG-IFAMVP---FAILAAVPT--APVAY
MelB        240 ALAYNVASNIITGFAIVYFSYVIGDAD-----LFPVYSYAGAANDVTIVFFPRVKSLSRRILWAGASILPVLSCGVLLLMALMSYHNVVIV
NP_414804   236 KMATCSNVVGGATLYEVKIVMDHPE-----LATQFLYGLSLATMPGSLCSSRLGFRDVTAFKWIIVAYSLL---ISLLFVTPAEHALIF
YP_324084   252 YLFSWLVGVOITASIIPIYEVVINCMSLPE-----SDIPTMIAVQGTALLMFLVWGAISKKIKKRLVYFLGMSLWII---AAAGLFFLQPGQISLMI
YP_001865367 264 YLFSWLVAVOITASIIPIYEVVNYMLKKE-----SDVPMIAVQGTALLMFLVWGAISKKIKKRLVYFLGMSLWII---AAAGLFFLQPGQISLMI
YP_002462749 243 YLFSWLVAVOITSSVLTPIVFWLGSVPQPTTAFGLTFGSASDLIPMLFAVQGSALVFLVWGAISRRVGNKNAVYMGSLIWIQ---VQAFLFFLQPGQISLAI
YP_002483054 256 YLCSWLVAVOITASIIPIYEVVNMGIKE-----ANVPLVLMGVOGALMFLVWGAISRRVGNKNAVYMGSLIWIQ---AQIGLFFLQPGQDALIF

hmfsd2a     386 AVRVARGISVAAPFLPNSMIPDVIDDFHKKOPHFHGTPIFFESVYFPTKRFASGVSGISTLSDFAGYQTRGCS-----QPERVKFTLNHLVMTAIVLILL
hmfsd2b     373 VVFPVSGVSIASVLLPNSMIPDVIDDFQOHRRHGPGIEFFVSSVYFPTKRSQCAIGISTLSDFSGYKAGVCK-----QAEVVVTLKVLIGAVPACMILA
MelB        329 IAGILLNVGTALFMVLOVIMVADTVDYGYKLVHVC-----ESLAVSVOTMVGQGSFAFAFFAVVGMICVVPNVQ-----STQALLMGQPIIMIALPFFWV
NP_414804   322 ALNIFLFFVNTTFLQVLMASDVVDYVESRSGRLL--DGLVFSTYLFSLKGLAIGGAVGVGMLAYVNSASVSV-----QPVVLTIKILFCVVEVLYAG
YP_324084   339 VMAVMAGVGVSTAYLIPNSMIPDVIDDELORGORR--EGIFYGFMVLLQKKGFLAFGLFLVGNALQASGFKESAVAGQTTLPLOPESALFAIRIAGVPTVTCCLF
YP_001865367 352 VMAVMAGVGVSTAYLIPNSMIPDVIDDELORGORR--EGIFYGFMVLLQKKGFLAFGLFLVGNALQASGFKESVAG-SPLPIOPESALFAIRIAGVPTVTCCLC
YP_002462749 345 VLGVVAGAVATAYLIPNSMIPDVIDDELORGORR--EGIFYGFMVLLQKKGFLAIGFLVGNALQAFAGFNETLPP---GQOPESALLAIRLLIGPMPVILIC
YP_002483054 343 GLAVLAGCVGVSTAYLIPNSMIPDVIDDELORGORR--EGIFYGFMVLLQKKGFLAIGLQVLMVEVFGFKATPPPQALPPVOPESALWAIRLVAPEAVLILL

hmfsd2a     485 GLVIFK-MYPIDEERRRQNKKAQALRDEASSGSCSETDSTELASIL--
hmfsd2b     472 GLCILM-VGSTPKTPSRDASSRLR-----
MelB        425 TLIDYFRFVRLNGDTRRLRIQHLLDKYRKVPEPVHADIPVGAVSDVKA
NP_414804   419 MFIMLS-LVKLIDARVEAISRQIKHRAAQEAVPDAATAASH-----
YP_324084   442 GLVITY-FYPIIREMHAEILLKQERQKQRETHPE-----
YP_001865367 454 GLVITY-FYPIIREMHAEMLKQERQKQKGT-----
YP_002462749 444 GMLTA-FYPIIKASHVETLKRQEARLQR-----
YP_002483054 446 GLVLA-FYPIIREMHAEILLKQERKTQET-----

```

Fig. S1. Multiple-sequence alignment of MFS2A and bacterial MFS transporters. Protein sequence alignment of human MFS2A, MFS2B, and bacterial sugar transporters. Melbiose permease (MelB; melbiose sodium symporter [*Escherichia coli* ATCC 8739]); NP\_414804 or YagG [predicted galactose-pentose-hexuronide (GPH) transporter from *E. coli* str. K-12 substr. MG1655]; YP\_324084 galactoside symporter from *Anabaena variabilis* ATCC 29413; YP\_001865367 (also known as Npun\_F1762) sugar (GPH) transporter from *Nostoc punctiforme* PCC 73102; YP\_002462749 (also known as Cagg\_1406) sugar (GPH) transporter from *Chloroflexus aggregans* DSM 9485; YP\_002483054 (also known as Cyan7425\_2335) sugar (GPH) transporter of *Cyanothece* sp. PCC 7425.



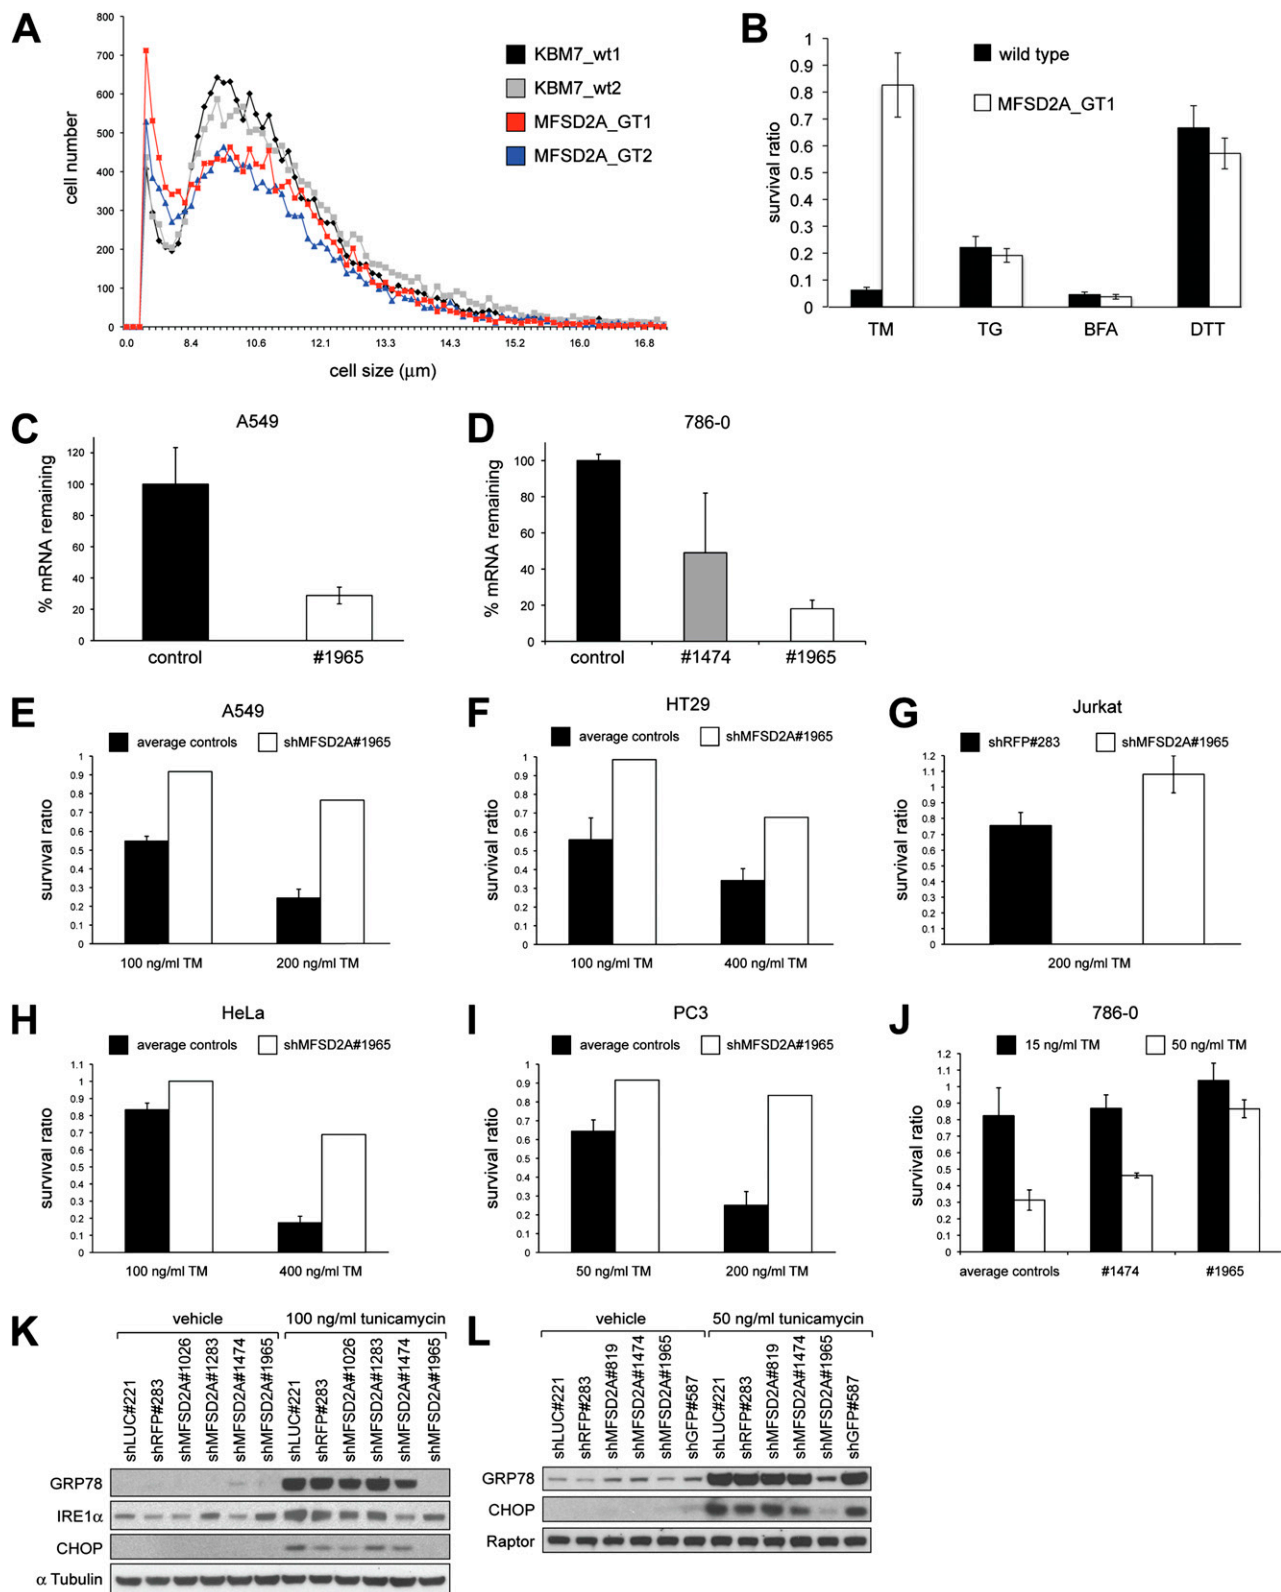

**Fig. S2.** MFS2A knockdown (KD) in different cell types. (A) Cell size distribution of WT KBM7 or MFS2A GT cells as determined with an automated Coulter Counter. (B) Treatment of WT KBM7 or MFS2A GT cells for 3 d with various ER stress-inducing drugs. TM, 500 ng/mL tunicamycin; TG, 1.25 nM thapsigargin; BFA, 6.25 ng/mL brefeldin A; DTT, 2 mM DTT. MFS2A KO cells are more resistant specifically to TM but not to other ER stressors compared with control cells. Viability was determined by the CellTiter Glo (CTG) assay (11 wells per genotype and conditions were analyzed). (C and D) Quantitative real-time PCR analysis of *MFS2A* mRNA levels in A549 (C) or 786-0 (D) cells infected with shMFS2A #1965 (denoted as #1965 in C, D, and J), shMFS2A #1474 (denoted as #1474 in D and J), or control hairpins. shMFS2A #1965-mediated MFS2A KD in A549 and 786-0 cells showed a greater than 70% and 80% reduction of *MFS2A* mRNA levels, respectively, whereas MFS2A KD using shMFS2A #1474 decreased transcript levels on average by 50% in 786-0 cells. *36B4* mRNA levels were used for normalization. (E–J) A number of cancer cell lines were infected with shMFS2A #1965 that led to the strongest KD in A549 and 786-0 cells. MFS2A  
Legend continued on following page

KD and control cells (infected with lentiviruses carrying hairpins against luciferase, GFP, or RFP) were exposed to various TM concentrations for 3–6 d, and cell viability was assessed by either the CTG assay (G; Jurkat T cells) or direct cell number count using a particle counter device (all other cell lines). Jurkat cells (G) were seeded in 96-well plates, and bars represent the mean survival ratio  $\pm$  SD of 11 wells for each condition. Representative results of multiple experiments are shown for A549, HT29, HeLa, and PC3 cells yielding qualitatively similar results. Two independent MFSD2A shRNAs (#1474 and #1965) were used for KD in 786–0 cells. Three wells per genotype and condition were counted for the 786–0 cells, and mean values  $\pm$  SD are shown;  $P < 0.05$  for both genotypes (50 ng/mL TM) using Student two-tailed *t* test (*J*). Survival ratio was determined by comparing TM-treated to untreated cells. Average controls refers to the mean  $\pm$  SE of three different control hairpin survival ratios (duplicate samples for each hairpin). (K–L) Lentiviral shRNA-mediated MFSD2A KD in A549 (K) and 786–0 (L) cells and its effect on ER stress induction in response to TM. Cells infected with shMFSD2A #1965 and to a lesser extent, shMFSD2A #1474 mitigated ER stress marker induction in all cell lines tested. Cells were incubated with TM for 22 (A549) or 24 h (786–0).

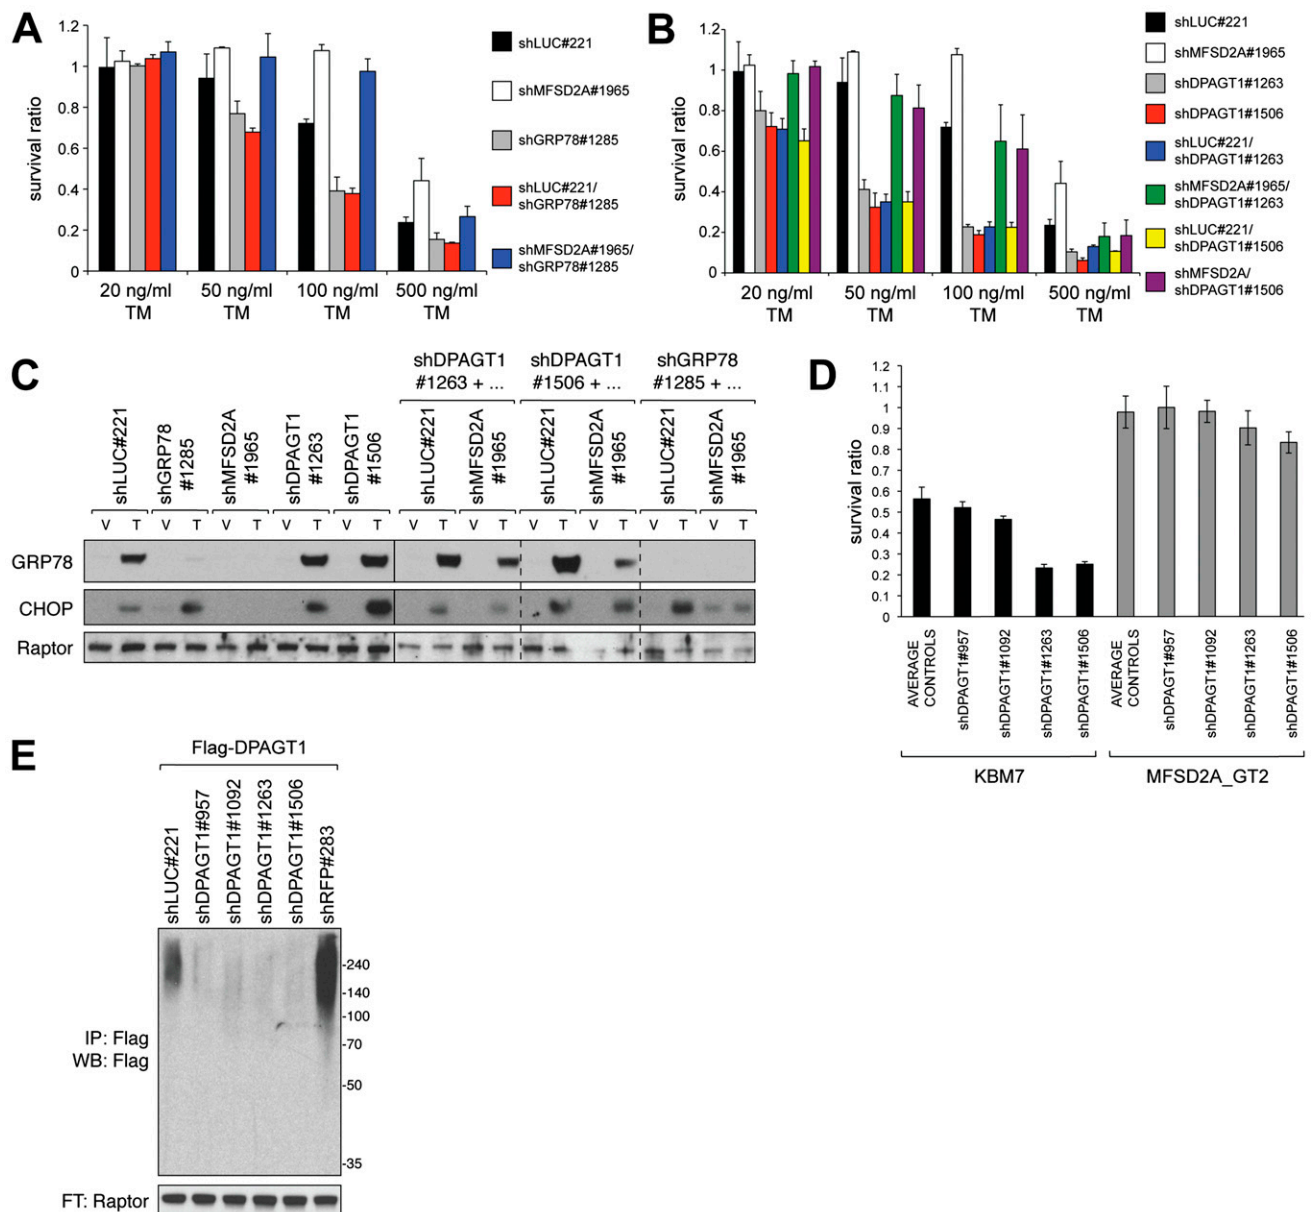

**Fig. 53.** Co-KD of MFSD2A/GRP78 and MFSD2A/DPAGT1 uncovers the single MFSD2A mutant phenotype. (A and B) A549 cells were transduced in a first round with lentiviruses bearing validated shRNAs against GRP78 (A) or DPAGT1 (B), and stable KD lines were obtained by antibiotic selection (see also C and E for KD validation). In a second round, shGRP78- and shDPAGT1-infected cells were reinfected with lentiviruses carrying either a control hairpin (shLUC#221) or shMFSD2A #1965. Double KD A549 cells were grown for 3 d without or with various TM concentrations, and cell survival was measured by scoring surviving cells as described previously. Average survival ratios  $\pm$  SD of two independent experiments are presented. Infection efficiency for the second round of infection with shMFSD2A #1965 was  $\sim$ 90%. Because the resistance marker for the second round of infection was the same as for the initial infection, the partial epistatic TM-resistance phenotype in the double KD lines might represent an underestimation of the strength of the MFSD2A single KD phenotype. (C) Western blot analysis of lysates of vehicle- or TM-treated A549 single and double KD lines described in A and B. Treatment duration was 24 h. V, vehicle; T, 100 ng/mL TM. (D) WT or MFSD2A\_GT KBM7 cells were infected with four different DPAGT1 hairpins, and stable cell clones were established by puromycin selection. These DPAGT1 KD cells were grown for 88 h in 96-well plates in media containing 75 ng/mL TM. The CTG assay was used to determine the survival ratio calculated by dividing the mean luminescence values of 11 TM-treated wells by the corresponding untreated values for each genotype. (E) KD effectiveness of shDPAGT1 hairpins used in B–D. Flag-DPAGT1 and individual shDPAGT1 or control hairpin constructs were cotransfected into HEK293T cells and grown for 48 h before cell lysis and Flag immunoprecipitation. Immunoblotting for Flag peptide was performed to assess DPAGT1 KD levels.

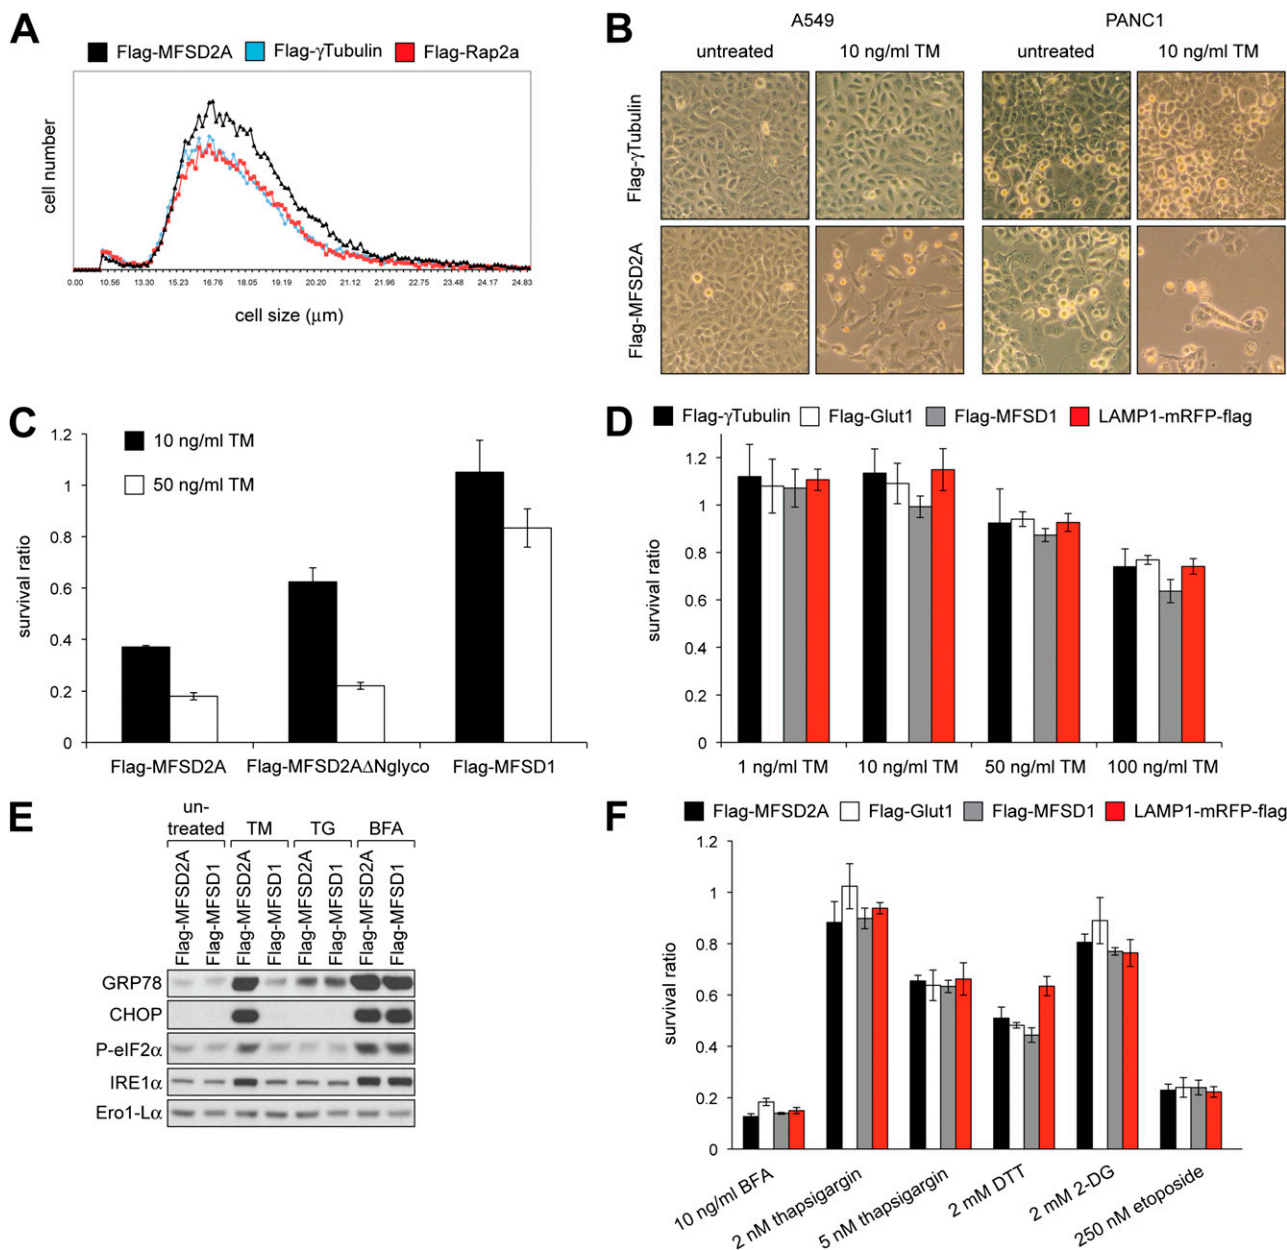

**Fig. S4.** Effects of MFSD2A overexpression on cell size and diverse drug treatments. (A) Stable A549 cells expressing the indicated proteins were seeded into 6-cm tissue culture dishes 24 h before cell size analysis. Cell size was measured using a Z2 Coulter Counter analyzer. Average size of Flag-MFSD2A-expressing cells is slightly bigger than control cells expressing  $\gamma$ -Tubulin or Rap2a, which is also indicated by the right shift of the curve ( $P < 0.05$  using Student two-tailed  $t$  test). Three different plates for each genotype were seeded, and cell size data were analyzed in a pooled fashion for each genotype. Two independent experiments with similar results were performed. (B) Bright-field images of stable A549 or PANC1 cells overexpressing Flag- $\gamma$ -Tubulin or Flag-MFSD2A and treated with TM for 3 (A549) or 5 d (PANC1). (C) Stable A549 cells expressing the indicated proteins were treated for 3 d with TM, and cell survival was determined with a Coulter Counter. Bars represent the mean  $\pm$  SD of three replicates per genotype and condition. (D) A549 cells stably overexpressing various control proteins and treated with TM for 3 d have similar survival ratios. Three biological replicates of each genotype were counted with a Z2 Coulter Counter, and the mean  $\pm$  SD is shown. (E) Comparison of ER stress marker induction between MFSD2A and MFSD1 overexpression in A549 cells treated with the indicated drugs. Treatment duration was 24 h, and the following concentrations were used: 10 ng/mL TM, 10 nM thapsigargin (TG), and 50 ng/mL BFA. (F) Stable A549 cells were exposed to various ER stress-inducing chemicals as well as the DNA damage-inducing drug etoposide for 3 d, and survival ratios were derived from Coulter Counter measurements. No differences in viability were observed between MFSD2A-overexpressing cells and control cells. Bars and error bars represent ratios of cell numbers of treated to untreated samples  $\pm$  SD in triplicate studies.

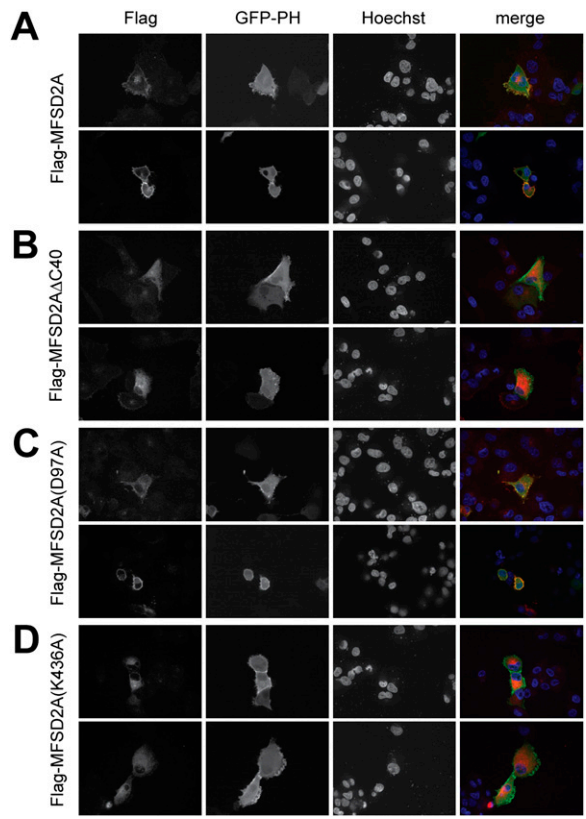

**Fig. S5.** MFSD2A localization in PANC1 cells. The indicated epitope-tagged MFSD2A constructs and the plasma membrane reporter GFP-PH were co-transfected into PANC1 cells. Cells were fixed 24 h after transfection and processed for immunofluorescence. Two independent examples of single optical sections of images obtained by confocal microscopy are presented. Additional details are in the text. (A) Flag-MFSD2A (WT), (B) Flag-MFSD2A $\Delta$ C40, (C) Flag-MFSD2A(D97A), and (D) Flag-MFSD2A(K436A).

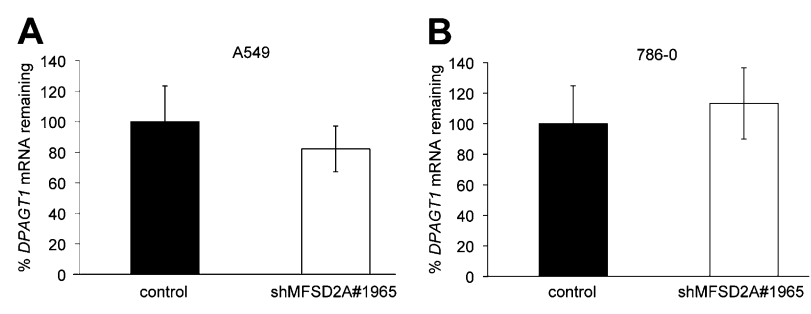

**Fig. S6.** No increase in *DPAGT1* mRNA levels in MFSD2A KD cells. Total mRNA isolated from A549 (A) or 786-0 (B) cells that were infected with control or shMFSD2A #1965 hairpins showed no statistically significant differences in *DPAGT1* transcript levels ( $P = 0.34$  for A and  $P = 0.53$  for B using Student two-tailed *t* test; experimental data derived from three biological replicates).



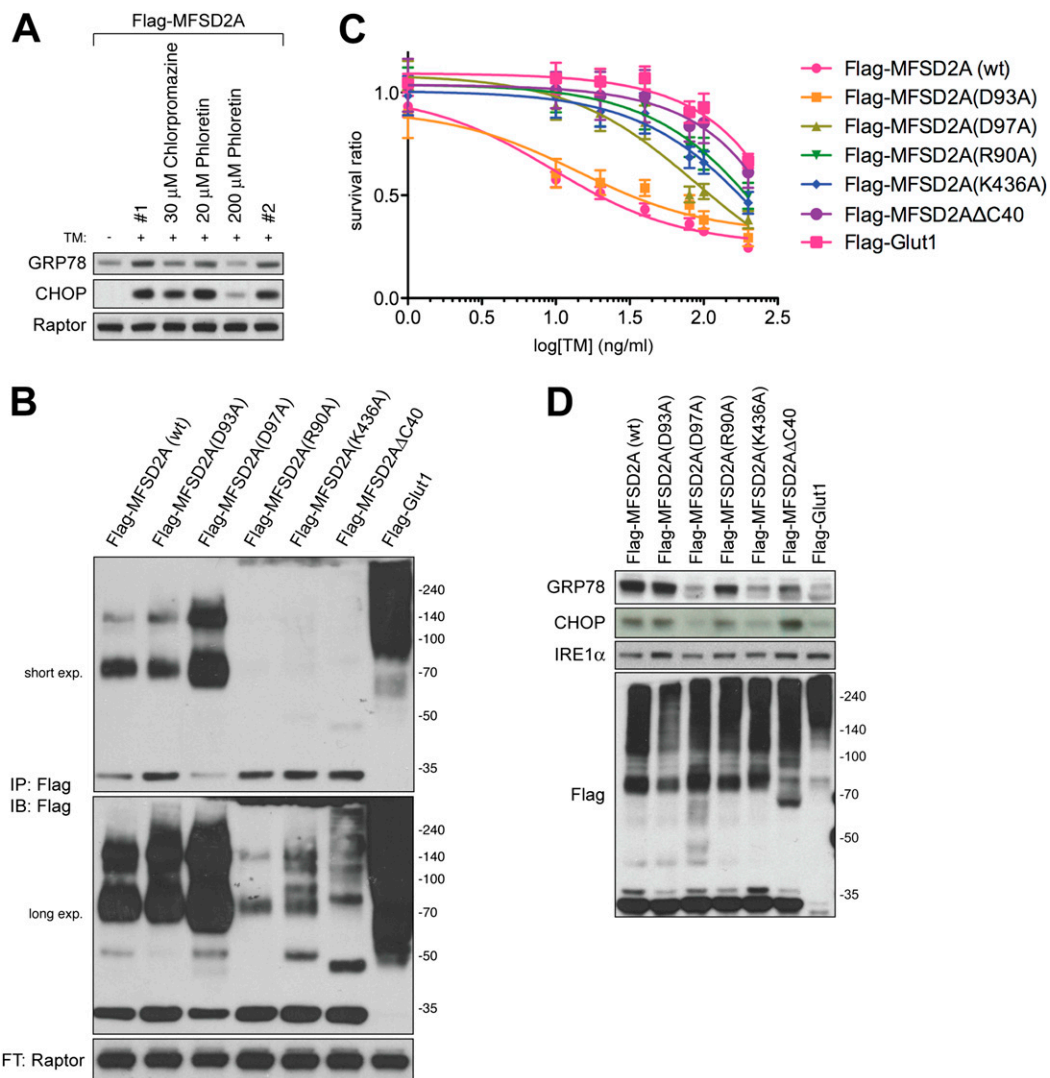

**Fig. S7.** Effects of alterations of cellular ion homeostasis and MFSD2A point mutations on TM sensitivity. (A) Flag-MFSD2A-overexpressing A549 cells were either left untreated (-) or cotreated for 6 h with 10 ng/mL TM (+) and Chlorpromazine (30  $\mu$ M) or Phloretin (20  $\mu$ M and 200  $\mu$ M). #1 and #2 refer to TM-only treatments. (B) Expression levels of indicated MFSD2A mutants and control proteins (short and long blot exposure). The Flag-tagged proteins were immunopurified before SDS/PAGE. FT, flow through of lysate used for IP. (C) TM dose-response curves of individual A549 lines overexpressing different MFSD2A mutants or control proteins. Cells were treated with 1, 10, 20, 40, 80, 100, or 200 ng/mL TM for 3 d. Note that the R90A and K436A mutant lines showed reduced MFSD2A expression levels (B). (D) The indicated constructs were transfected into HEK293T cells and treated with 10 ng/mL TM for the last 22 h before lysis. MFSD2A(D97A)- and MFSD2A(K436A)-expressing HEK293T cells do not up-regulate ER stress markers when treated with TM.



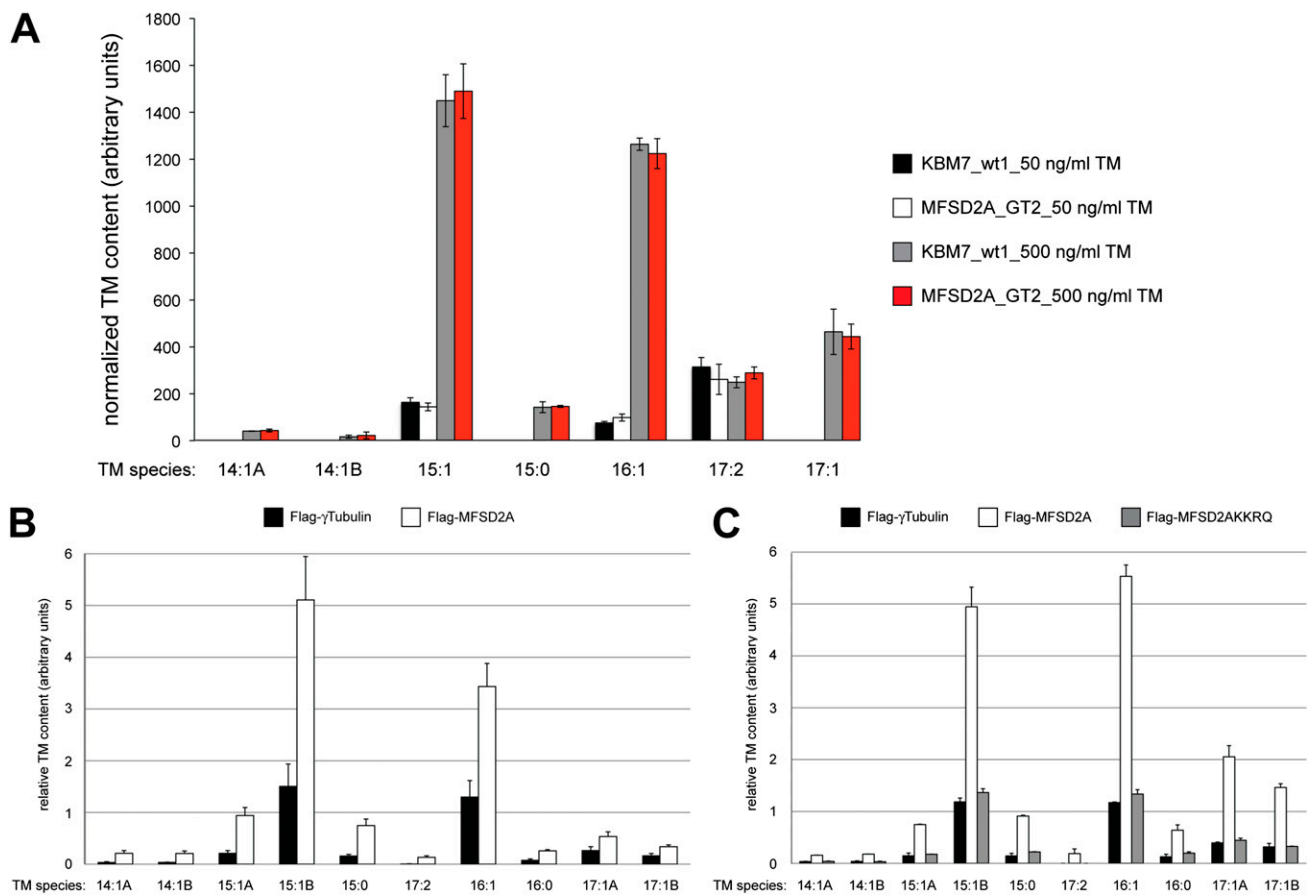

**Fig. S8.** Detection of TM by MS in MFSD2A GT or MFSD2A overexpression cells. (A) KBM7 WT or MFSD2A GT cells were incubated with 50 or 500 ng/mL TM for 22 h before lysis. No statistically significant difference in TM content could be detected. (B and C) Cells that overexpress MFSD2A show significantly enhanced TM uptake compared with control cells ( $P < 0.05$  for stable A549 and  $P < 0.03$  for PANC1 cell lines). Note that cells overexpressing ER-targeted MFSD2A (MFSD2AKKRQ) do not have increased TM content relative to control cells (C). (B) Stable PANC1 cells overexpressing MFSD2A or  $\gamma$ -Tubulin were treated for 7 h with 500 ng/mL TM before cell lysis and TM MS analysis. Sample processing and TM detection were done as described in *SI Materials and Methods*. (C) Stable A549 cell lines overexpressing WT MFSD2A, ER-directed MFSD2A, or  $\gamma$ -Tubulin were treated with 500 ng/mL TM for 24 h.

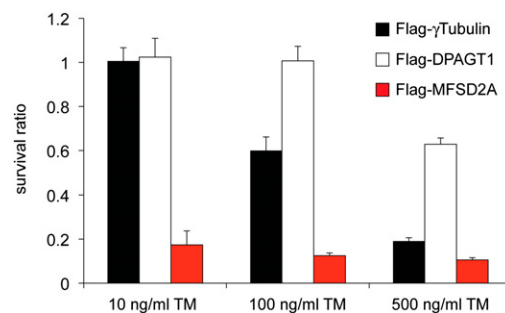

**Fig. S9.** DPAGT1 overexpression provides TM resistance. Stable A549 cell lines expressing Flag-DPAGT1, Flag- $\gamma$ -Tubulin, or Flag-MFSD2A were treated for 3 d with TM, and surviving cells were scored with an automated Coulter Counter. Shown for illustration are the means  $\pm$  SD of three replicates per genotype and condition.

**Table S1. Hairpins**

| shRNA         | NM number            | TRC clone ID   | Target sequence        |
|---------------|----------------------|----------------|------------------------|
| shGFP#587     | —                    | TRCN0000072186 | TGCCCGACAACCACTACCTGA  |
| shLUC#221     | —                    | TRCN0000072246 | CAAATCACAGAATCGTCGTAT  |
| shRFP#283     | —                    | TRCN0000072203 | CGCGTGATGAACTTCGAGGAC  |
| shMFSD2A#819  | NM_032793.2-819s1c1  | TRCN0000122696 | GCTTCACAAAGTGCCAACCAT  |
| shMFSD2A#1026 | NM_032793.2-1026s1c1 | TRCN0000139788 | CACGGCCCATACATCAAACCTT |
| shMFSD2A#1283 | NM_032793.2-1283s1c1 | TRCN0000143913 | CATGGAGAGTAACCTCATCAT  |
| shMFSD2A#1474 | NM_032793.2-1474s1c1 | TRCN0000140801 | GAGTGCTACTGGGCATTCTA   |
| shMFSD2A#1965 | NM_032793.2-1965s1c1 | TRCN0000122777 | CCACTGTGAATATGCCAAGGA  |
| shDPAGT1#957  | NM_001382.2-957s1c1  | TRCN0000036023 | CTGTACCAATGCCATCAATAT  |
| shDPAGT1#1092 | NM_001382.2-1092s1c1 | TRCN0000036022 | CCTTACTTCATGATACCTT    |
| shDPAGT1#1263 | NM_001382.2-1263s1c1 | TRCN0000036019 | CCAGGTGTTCAACTTCCTCTA  |
| shDPAGT1#1506 | NM_001382.2-1506s1c1 | TRCN0000300800 | CCTCATCAACTTGCTACTTAA  |
| shGRP78#1285  | NM_005347.x-1285s1c1 | TRCN0000001024 | CTTGTTGGTGCTCGACTCGA   |

TRC, The RNAi Consortium.
